# Supplementary material for: Biomimetic mineralisation of polymeric scaffolds using a combined soaking and Kitano approach
Source: Royal Society of Chemistry journal article supplement (doi:10.1039/c1dt11056j), 2011-01-01
Supplement: c1dt11056j.pdf [file c1dt11056j.pdf]

## Biomimetic mineralisation of polymeric scaffolds using a combined soaking and Kitano approach - Supplementary information

Natasha H. Munro, David W. Green#, Ashley Dangerfield, Kathryn M. McGrath\*

*MacDiarmid Institute for Advanced Materials and Nanotechnology, School of Chemical and Physical Sciences, Victoria University of Wellington, PO Box 600, Wellington, New Zealand*

*# Current address Queensland Eye Institute, 41 Annerley Road, South Brisbane 4101 Queensland, Australia*

\*Corresponding Author. Email: Kathryn.McGrath@vuw.ac.nz

Phone: (+64) 4-4635963

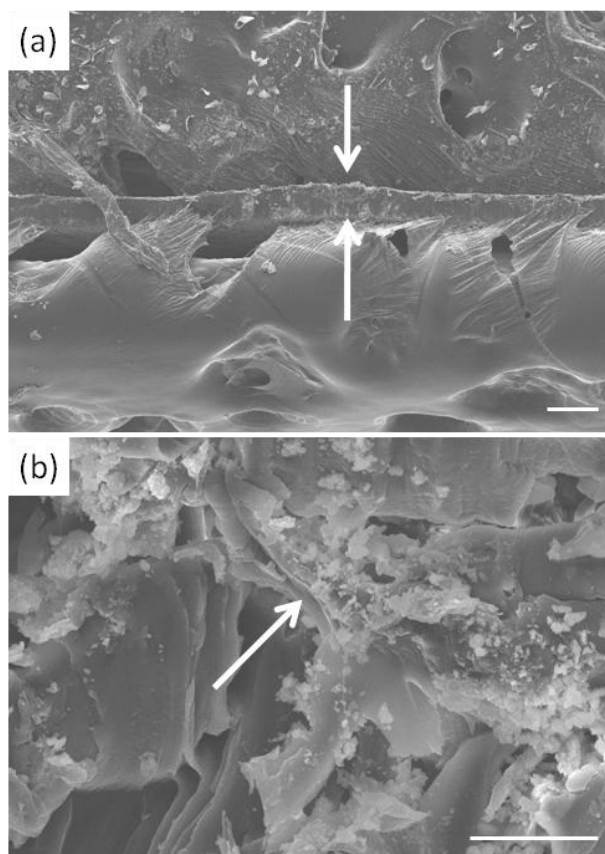

Figure S1 – SEM images of a cross-section of chitosan film treated with alternate soaking followed by Kitano solution prepared under static growth conditions. The sample was cleaved with a scalpel and mounted between two pieces of carbon tape on a cut stub. (a) The film between two pieces of carbon tape. The arrows indicate the peripheral surfaces of the mineralised film, the remainder of the image corresponding to the two pieces of carbon tape. Scale bar = 100  $\mu\text{m}$ . (b) The interior of the film showing the crystallisation within the chitosan template. The arrow indicates a region of mineralisation. Scale bar = 5  $\mu\text{m}$ .

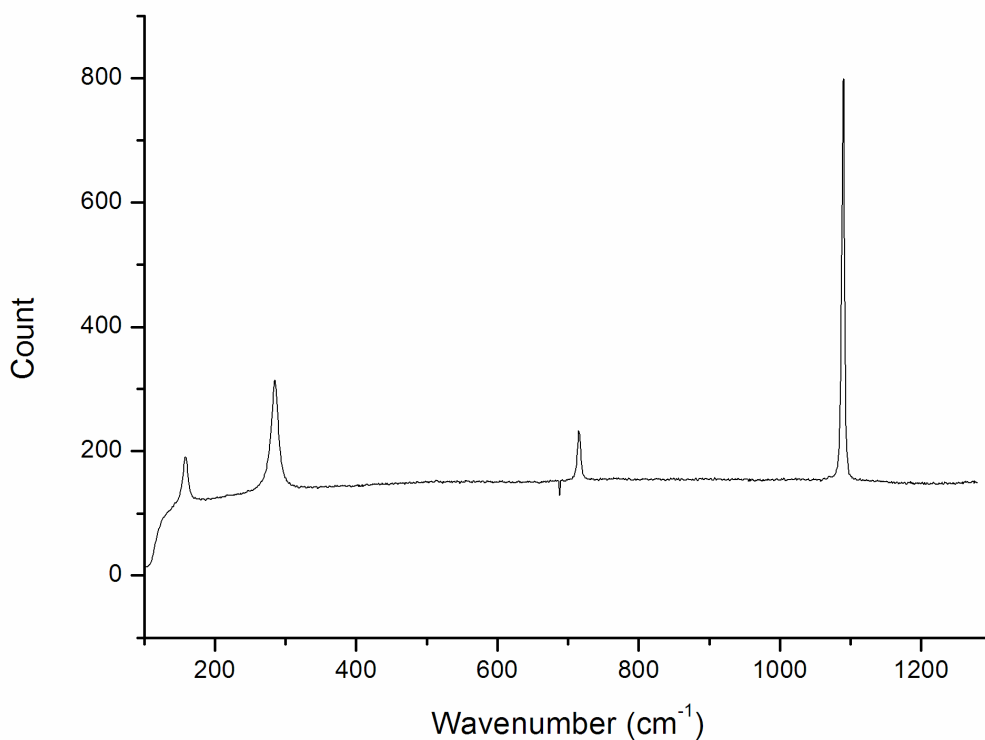

Figure S2 – A representative microRaman spectrum of a mineralised chitosan film. The peak positions at 284, 712 and 1086 cm<sup>-1</sup> are assigned to the lattice mode,  $\nu_4$  in-plane bend and  $\nu_1$  symmetric stretch, respectively, of calcite.

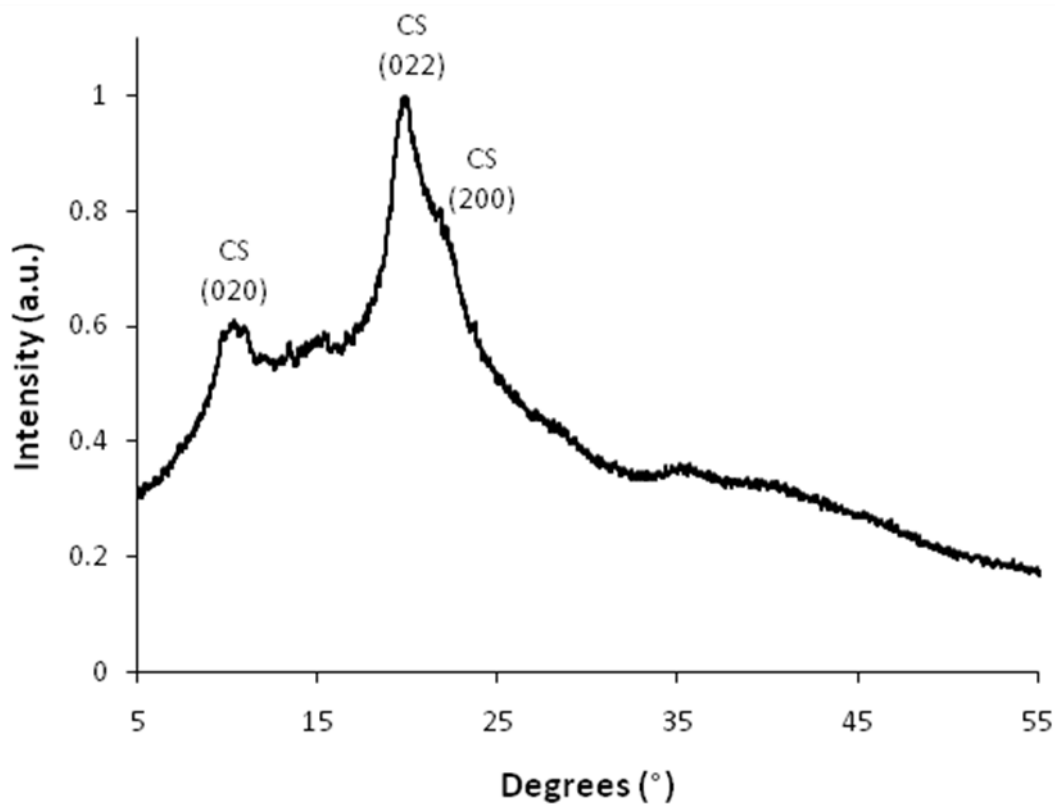

Figure S3 – XRD pattern of a base-treated and washed chitosan film. The peaks at  $^{\circ}2\theta$  ((Bragg planes also given) were 10.2 (020), 19.8 (022) and (shoulder) 22.0 (200).

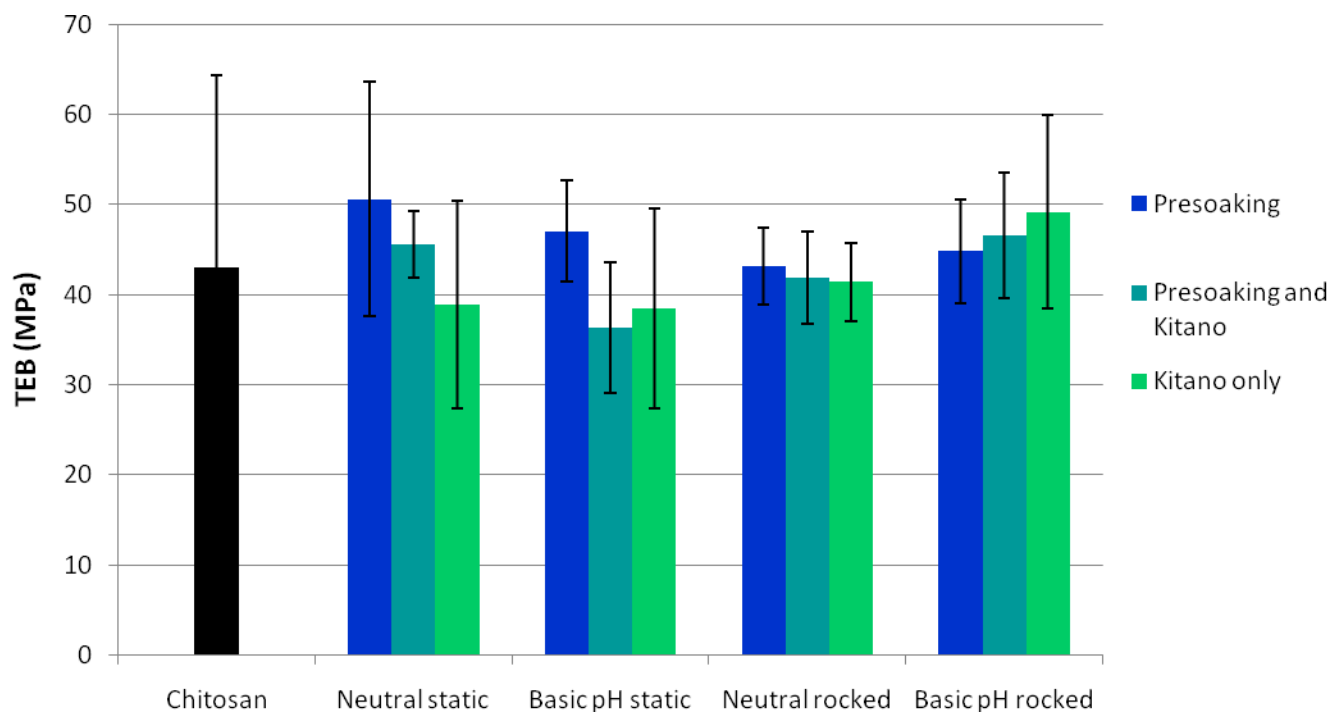

Figure S4 - The mechanical strength of chitosan/CaCO<sub>3</sub> composites prepared with different growth conditions and crystallisation solutions.
